# Supplementary material
Source: PubMed Central journal article supplement (PMC2911014)
Supplement: NIHMS201678-supplement-1_si_001.pdf [file NIHMS201678-supplement-1_si_001.pdf]

## **SUPPLEMENTAL DATA**

### **Modulation of Cellular Adhesion by Glycoengineering**

Laila Dafik,<sup>†</sup> Marc d'Alarcao,<sup>†,‡</sup> and Krishna Kumar<sup>†,§</sup>

*<sup>†</sup>Department of Chemistry, Tufts University, Medford, Massachusetts 02155, <sup>‡</sup>Department of Chemistry, San José State University, San José, California 95192 and <sup>§</sup>Cancer Center, Tufts Medical Center, Boston, Massachusetts 02110*

## Adhesion on P-Selectin coated plate

### Before Wash

| Replicate #            | Untreated | 2a       | 3a       | 4a       | 5a       |
|------------------------|-----------|----------|----------|----------|----------|
| 1                      | 28593     | 30275    | 29618    | 33156    | 40212    |
| 2                      | 31761     | 25923    | 33193    | 32822    | 42740    |
| 3                      | 38144     | 23252    | 34228    | 35635    | 42827    |
| 4                      | 36894     | 23596    | 36561    | 37684    | 43220    |
| MEAN                   | 33848.00  | 25761.50 | 33400.00 | 34824.25 | 42249.75 |
| STD DEV                | 4461.10   | 3234.44  | 2888.13  | 2282.36  | 1374.45  |
| STD DEV (%)            | 13.18     | 12.56    | 8.65     | 6.55     | 3.25     |
| MEAN – BKGRD (lane 11) | 33848.00  | 25761.50 | 33400.00 | 34824.25 | 42249.75 |

### After Wash

| Replicate #  | Untreated | 2a      | 3a      | 4a      | 5a      |
|--------------|-----------|---------|---------|---------|---------|
| 1            | 5304      | 6660    | 4419    | 3705    | 3366    |
| 2            | 10537     | 6058    | 2526    | 5718    | 1251    |
| 3            | 11526     | 5754    | 4203    | 6897    | 2896    |
| 4            | 15291     | 6003    | 4764    | 8391    | 5034    |
| MEAN         | 10664.50  | 6118.75 | 3978.00 | 6177.75 | 3136.75 |
| STD DEV      | 4118.98   | 384.31  | 995.19  | 1978.35 | 1556.29 |
| STD DEV (%)  | 38.62     | 6.28    | 25.02   | 32.02   | 49.61   |
| MEAN – BKGRD | 10664.50  | 6118.75 | 3978.00 | 6177.75 | 3136.75 |

### Average % Adhesion

| Replicate # | Untreated | 2a     | 3a     | 4a     | 5a    |
|-------------|-----------|--------|--------|--------|-------|
| 1           | 0.185     | 0.220  | 0.149  | 0.112  | 0.084 |
| 2           | 0.332     | 0.234  | 0.076  | 0.174  | 0.029 |
| 3           | 0.302     | 0.247  | 0.123  | 0.194  | 0.068 |
| 4           | 0.414     | 0.254  | 0.130  | 0.223  | 0.116 |
| MEAN        | 0.308     | 0.239  | 0.120  | 0.176  | 0.074 |
| STD DEV     | 0.095     | 0.015  | 0.031  | 0.047  | 0.036 |
| STD DEV (%) | 9.476     | 1.526  | 3.105  | 4.696  | 3.624 |
| MEAN*100    | 30.847    | 23.889 | 11.960 | 17.554 | 7.427 |

### Data table for Student's t-test

|                     |       |        |        |        |       |
|---------------------|-------|--------|--------|--------|-------|
| Sx – BKGRD          | 0.308 | 23.889 | 11.960 | 17.554 | 7.427 |
| n                   | 4     | 4      | 4      | 4      | 4     |
| mean (xbar) – BKGRD | 0.077 | 5.972  | 2.990  | 4.389  | 1.857 |
| Sx ^2               | 0.408 | 0.229  | 0.060  | 0.130  | 0.026 |
| (Sx )^2             | 0.095 | 0.057  | 0.014  | 0.031  | 0.006 |
| (Σx)^2/n            | 0.024 | 0.014  | 0.004  | 0.008  | 0.001 |
| Sd ^2               | 0.384 | 0.215  | 0.057  | 0.122  | 0.025 |
| s^2                 | 0.128 | 0.072  | 0.019  | 0.041  | 0.008 |

### Student's t-test (controls in lanes 1 to 5)

#### vs. lane 1

|                                  |       |        |        |        |       |
|----------------------------------|-------|--------|--------|--------|-------|
| $\sigma d^2$ (comp to lane 1)    | 0.064 | 0.050  | 0.037  | 0.042  | 0.034 |
| SQRT( $\sigma d^2$ )= $\sigma d$ | 0.253 | 0.223  | 0.192  | 0.205  | 0.184 |
| t (vs. lane 1)                   | 0.000 | 26.397 | 15.207 | 20.997 | 9.646 |

|   |   |       |       |       |       |
|---|---|-------|-------|-------|-------|
| P | F | 0.001 | 0.001 | 0.001 | 0.001 |
|---|---|-------|-------|-------|-------|

#### vs. lane 2

|                                  |        |       |         |        |         |
|----------------------------------|--------|-------|---------|--------|---------|
| $\sigma d^2$ (comp to lane 2)    | 0.050  | 0.036 | 0.023   | 0.028  | 0.020   |
| SQRT( $\sigma d^2$ )= $\sigma d$ | 0.223  | 0.189 | 0.150   | 0.168  | 0.141   |
| t (vs. lane 2)                   | 46.083 | 0.000 | 158.253 | 38.886 | 501.411 |

|   |       |   |       |       |       |
|---|-------|---|-------|-------|-------|
| P | 0.001 | F | 0.001 | 0.001 | 0.001 |
|---|-------|---|-------|-------|-------|

#### vs. lane 3

|                                  |        |        |       |        |         |
|----------------------------------|--------|--------|-------|--------|---------|
| $\sigma d^2$ (comp to lane 3)    | 0.037  | 0.023  | 0.009 | 0.015  | 0.007   |
| SQRT( $\sigma d^2$ )= $\sigma d$ | 0.192  | 0.150  | 0.097 | 0.122  | 0.082   |
| t (vs. lane 3)                   | 22.771 | 41.670 | 0.000 | 34.342 | 138.075 |

|   |       |       |   |       |       |
|---|-------|-------|---|-------|-------|
| P | 0.001 | 0.001 | F | 0.001 | 0.001 |
|---|-------|-------|---|-------|-------|

#### vs. lane 4

|                                  |        |        |        |       |         |
|----------------------------------|--------|--------|--------|-------|---------|
| $\sigma d^2$ (comp to lane 4)    | 0.042  | 0.028  | 0.015  | 0.020 | 0.012   |
| SQRT( $\sigma d^2$ )= $\sigma d$ | 0.205  | 0.168  | 0.122  | 0.143 | 0.111   |
| t (vs. lane 4)                   | 33.704 | 22.128 | 74.217 | 0.000 | 308.472 |

|   |       |       |       |   |       |
|---|-------|-------|-------|---|-------|
| P | 0.001 | 0.001 | 0.001 | F | 0.001 |
|---|-------|-------|-------|---|-------|

#### vs. lane 5

|                                  |        |        |        |        |       |
|----------------------------------|--------|--------|--------|--------|-------|
| $\sigma d^2$ (comp to lane 5)    | 0.483  | 1.957  | 1.212  | 1.561  | 0.928 |
| SQRT( $\sigma d^2$ )= $\sigma d$ | 0.695  | 1.399  | 1.101  | 1.250  | 0.964 |
| t (vs. lane 5)                   | 13.911 | 57.506 | 60.139 | 62.171 | 0.000 |

### Legend

F = Failed

|   |       |       |       |       |   |
|---|-------|-------|-------|-------|---|
| P | 0.001 | 0.001 | 0.001 | 0.001 | F |
|---|-------|-------|-------|-------|---|

**Table S1.** Typical data table for adhesion experiments. Data are shown for adhesion to P-selectin. “Before Wash” and “After Wash” values are direct reads from the plate reader. The “Average % adhesion” was calculated as described under 'Cell Adhesion Assays' (EXPERIMENTAL PROCEDURES). See also Figure 4.

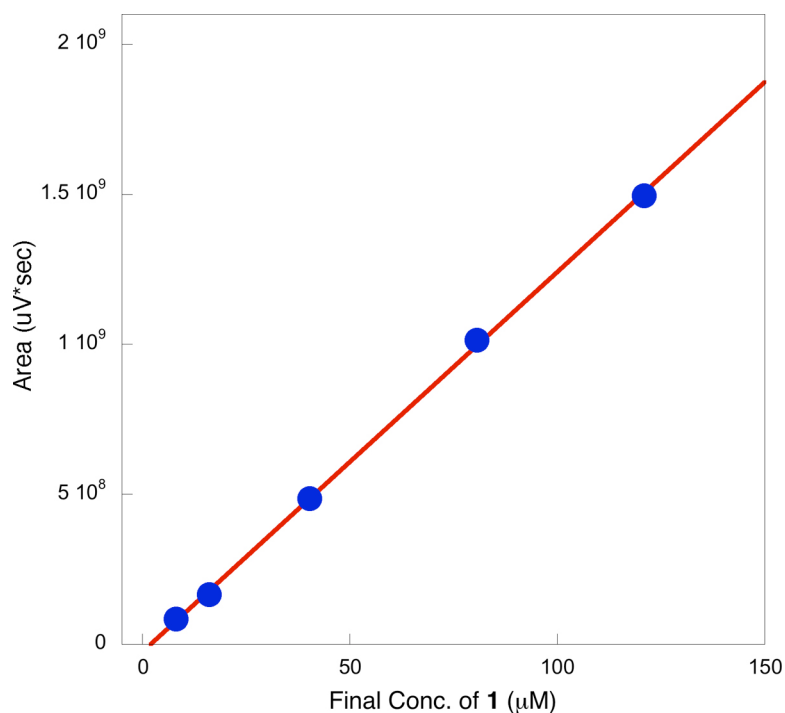

**Figure S1.** Sialic acid DMB labeling. Standard curve for quantification of DMB-labeled sialic acids using fluorescence detection by HPLC ( $\lambda_{\text{detection, em}} = 448 \text{ nm}$ ). See also Table 1.

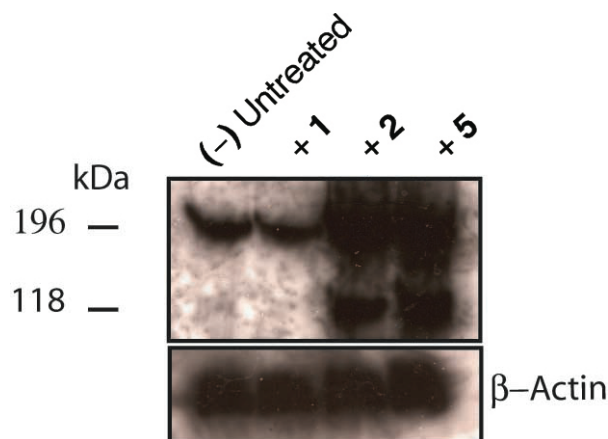

**Figure S2.** Expression of sialyl-Lewis<sup>x</sup> on CD162 in HL60 cells treated with modified sialic acid derivatives. Representative Western blot of HL60 cells incubated with compounds **1a**, **2a**, and **5a** for 3 days. Cell lysates were separated on SDS-PAGE and analyzed with the sialyl-Lewis<sup>x</sup>-specific monoclonal antibody KM93 ( $n = 2$ ) and with a  $\beta$ -actin specific antibody (Affinity BioReagents MA1-744, clone mAbGEa). CD162 appears as both monomer (100-120 kDa) and dimer (220-240 kDa) in SDS-PAGE (Horstkorte, M., Rau, K., Reutter, W., Nohring, S., and Lucka, L. (2004). Increased expression of the selectin ligand sialyl-Lewis(x) by biochemical engineering of sialic acids. *Exp. Cell Res.* 295, 549-554). See also Figure 4.
